# Supplementary material
Source: Research Square preprint supplement (doi:10.21203/rs.3.rs-10164745/v1)
Supplement: Supplementary file 1 [file 316d2db6dc511586f67c71fa.docx]

**AUDIT-AI — STARD-AI 2025 reporting checklist**

*Supplementary File 5. Mapped to the 40-item STARD-AI statement (Sounderajah V, Guni A, Liu X, et al. The STARD-AI reporting guideline for diagnostic accuracy studies using artificial intelligence.* ***Nat Med*** *2025;31(10):3283–3289. doi:10.1038/s41591-025-03953-8).*

*Items are paraphrased for this mapping, not reproduced verbatim (the statement is under exclusive Springer Nature licence). ***Type: **— retained from STARD 2015 · Modified † one of the four STARD items revised for AI (items 1, 3, 7, 25) · New * one of the 14 AI-specific additions. Results-section items will be completed in the results manuscript.

| **#** | **STARD-AI 2025 item (paraphrased)** | **Type** | **Where addressed in AUDIT-AI protocol v7** |
| --- | --- | --- | --- |
| **TITLE & ABSTRACT** |  |  |  |
| 1 | Identify the work as an AI-centred diagnostic-accuracy study and state at least one measure of accuracy in the title or abstract. | **Modified †** | Title; Abstract |
| 2 | Structured abstract of design, methods, results and conclusions (per the STARD-for-Abstracts guidance). | — | Abstract |
| **INTRODUCTION** |  |  |  |
| 3 | Scientific and clinical background, including the intended use of the index test, whether it is novel or established, and how it fits an existing or new workflow. | **Modified †** | Introduction (background); Detector ensemble |
| 4 | Study objectives and hypotheses. | — | Introduction — objectives and hypotheses H1–H5 |
| **METHODS — Study design** |  |  |  |
| 5 | Whether data collection was planned before (prospective) or after (retrospective) the index test and reference standard were performed. | — | Methods — Study design; Detector ensemble |
| **METHODS — Ethics** |  |  |  |
| 6 | Formal approval from an ethics committee, or a justification if approval was not required. | **New *** | Ethics & dissemination — NHSR determination (Supplementary File 1) |
| **METHODS — Participants / papers** |  |  |  |
| 7 | Eligibility criteria, with inclusion and exclusion listed in the order applied, at BOTH the participant level and the data level. | **Modified †** | Methods — Corpus construction (eligibility & exclusion) |
| 8 | On what basis potentially eligible papers were identified. | — | Methods — Corpus construction (Citation Classics) |
| 9 | Where and when potentially eligible papers were identified (setting, location, dates). | — | Methods — Corpus construction (Scopus/WoS; 1995–2020; 14-day scoring window) |
| 10 | Whether papers formed a consecutive, random, or convenience series. | — | Methods — Corpus construction (top-cited, epoch-stratified 25/arm/epoch) |
| **METHODS — Dataset (AI-specific)** |  |  |  |
| 11 | Source of the data and whether it was routinely collected, collected specifically for the study, or drawn from an open repository. | **New *** | Methods — Corpus construction (published literature; source PDFs) |
| 12 | Who labelled/annotated the data, and their expertise and procedure. | **New *** | Methods — Geographic classification (two raters + third-rater adjudication); arm assignment |
| 13 | Data-capture devices/software (manufacturer/model) and version, and their intended use. | **New *** | Methods — Detector ensemble & Arm C pipeline versions (LlamaParse, Sonnet 4.6, Haiku 4.5); Table 1 |
| 14 | Data-acquisition and pre-processing protocols in enough detail to allow replication. | **New *** | Methods — Arm C pipeline (Stages 1–3); code and schema on OSF |
| **METHODS — Index test (the AI detectors)** |  |  |  |
| 15a | Index test(s) described in sufficient detail to permit replication. | — | Methods — Detector ensemble; Table 1 |
| 15b | How the AI index test was developed: training, validation, testing and external evaluation, with sample sizes. | **New *** | Methods — Detector ensemble (proprietary commercial detectors; vendors do not disclose development; versions frozen and recorded) |
| 15c | Index-test positivity cut-offs or result categories, distinguishing pre-specified from exploratory. | — | Methods — Outcomes; SAP (25% / 50% / 75% thresholds) |
| 15d | The specified end user of the index test and the expertise needed to use it. | **New *** | Introduction & Detector ensemble (editors, integrity officers, admissions/grant screeners) |
| **METHODS — Reference standard** |  |  |  |
| 16a | Reference standard described in sufficient detail to permit replication. | — | Methods — Corpus construction (ground-truth authorship: human Arm A/B vs AI Arm C) and origin classification |
| 16b | Rationale for choosing the reference standard. | — | Methods — Arm C pipeline; Relation to prior work (decoupled air-gap) |
| 16c | Reference-standard cut-offs/categories, distinguishing pre-specified from exploratory. | — | Methods — Corpus construction (arm-membership categories) |
| **METHODS — Independence / masking** |  |  |  |
| 17a | Whether clinical information and reference-standard results were available to index-test readers. | — | Methods — Detector ensemble (automated scoring, blind to origin/arm) |
| 17b | Whether clinical information and index-test results were available to reference-standard assessors. | — | Methods — Geographic classification (raters blind to detector scores; classification precedes scoring) |
| **METHODS — Analysis** |  |  |  |
| 18 | Methods for estimating or comparing measures of accuracy. | — | Methods — Statistical analysis plan |
| 19 | How indeterminate index-test or reference-standard results were handled. | — | Methods — Sections analysed (abstract excluded below reliability floor) |
| 20 | How missing data were handled. | — | Methods — Quality control & stopping rules |
| 21 | Analyses of variability in accuracy, distinguishing pre-specified from exploratory. | — | Methods — SAP (subgroups & sensitivity analyses) |
| 22 | Intended sample size and how it was determined. | — | Methods — Sample size & power (paper-level unit; one-sided primary) |
| 23 | Analysis of performance errors, and assessment of algorithmic bias and fairness. | **New *** | Methods — Objectives & SAP (the study is itself a detector bias/fairness audit: H1, H4, H5) |
| **RESULTS — Participants / dataset (results manuscript)** |  |  |  |
| 24 | Flow of papers/data, using a diagram. | — | Results manuscript — planned flow shown in Figure 1 |
| 25 | Baseline demographic, clinical and technical characteristics of the training, validation and test datasets. | **Modified †** | Results manuscript — corpus characteristics (arm, epoch, IF tertile, citations, word counts) |
| 26a | Distribution of severity of the target condition. | — | Results manuscript — corpus topic distribution (clinical-severity item not applicable) |
| 26b | Distribution of alternative diagnoses in those without the target condition. | — | Results manuscript — corpus composition (clinical item not applicable) |
| 27 | Time interval and any interventions between index test and reference standard. | — | Results manuscript — scoring dates and test–retest interval |
| 28 | Whether the datasets reflect the target-condition distribution of the intended-use population. | **New *** | Results manuscript / Limitations — representativeness of the pre-2021 cardiometabolic corpus |
| 29 | For external evaluation, how the independent dataset differs from training/validation/test sets. | **New *** | Methods — Arm C pipeline (decoupled extraction/generation air-gap; epoch stratification); results in manuscript |
| **RESULTS — Test results (results manuscript)** |  |  |  |
| 30 | Cross-tabulation of index-test results against the reference standard. | — | Results manuscript |
| 31 | Estimates of accuracy with measures of precision (e.g. 95% CIs). | — | Results manuscript |
| 32 | Any adverse events from performing the index test or reference standard. | — | Results manuscript — not applicable (no clinical procedure) |
| **DISCUSSION** |  |  |  |
| 33 | Study limitations, including sources of potential bias, statistical uncertainty and generalisability. | — | Strengths-and-limitations box; Discussion |
| 34 | Implications for practice, including the intended use and clinical/operational role of the index test. | — | Implications & future directions |
| 35 | Ethical considerations, including fairness, of using the AI index test. | **New *** | Implications — equity in scientific publishing; fairness of detector deployment |
| **OTHER INFORMATION** |  |  |  |
| 36 | Registration number and name of registry. | — | Ethics & dissemination — registration (OSF) |
| 37 | Where the full study protocol can be accessed. | — | This protocol; OSF deposit (Supplementary File 3) |
| 38 | Sources of funding and other support, and the role of funders. | — | Funding statement |
| 39 | Commercial interests and conflicts relating to the AI index test. | **New *** | Competing interests (no financial ties to detector vendors, Anthropic or OpenAI) |
| 40a | Availability of the datasets and code, and any restrictions on reuse. | **New *** | Data & code sharing (OSF deposit, including the analysis pipeline and code; CC-BY 4.0) |
| 40b | Whether the AI model's outputs were stored and are auditable/available for evaluation. | **New *** | Data & code sharing (per-section audit logs with response IDs; Master Workbook) |
