# Supplementary material
Source: Research Square preprint supplement (doi:10.21203/rs.3.rs-10164745/v1)
Supplement: Supplementary file 2 [file 3b9e9209ab680f0ccb22c743.xlsx]

## Sheet: 00_README
AUDIT-AI — Master Analytical Workbook
Version 1.3 · companion to BMJ Open protocol v7 · one row = one unit of analysis on each data sheet
Sheet	Purpose
01_Corpus_Log	Master list of the 100 human papers (Arm A + Arm B): origin, epoch, IF tertile, citations, word counts.
02_Geographic_Classification	Two-rater institutional-origin classification + third-rater adjudication; Cohen's κ target ≥ 0.80.
03_ArmC_Generation_Log	Arm C generation audit: target vs generated prose words, ±15% QA gate, attempts, response IDs.
04_Detector_Scoring	CORE sheet — one row per text × section × detector × retest (target 4,000 rows). Includes flagged-words column.
05_Binary_Thresholds	Binary classification per text × detector at 25% / 50% / 75% thresholds (derived from sheet 04).
06_Reliability_ICC	Test–retest ICC(2,k) per detector (computed in R/Python; results recorded here). Pass ≥ 0.85.
07_Interdetector_Agreement	Per-text binary calls across the five detectors → Fleiss' κ at each threshold (H3).
08_Concordance_SubStudy	20-paper sub-study: derived whole-document AI% vs native single-document score (Bland–Altman / Lin's CCC / ICC(2,1)).
09_Derived_WholeDoc_AI	Word-weighted whole-document AI% = Σ flagged words ÷ Σ total words × 100 (Introduction + Discussion).
10_Phase2_Titles	Phase-2 spin-off corpus: 100 human vs 100 AI titles + rater scores (Likert + Flesch).
KEY CONVENTIONS
Text identifiers	Human papers P001–P100 (P001–P050 = Arm A, P051–P100 = Arm B). AI rewrites append '-AI' (e.g., P001-AI).
Arm	A = native-institution human · B = non-native-institution human · C = Claude Sonnet 4.6 rewrite.
Section	INT = Introduction · DIS = Discussion (only these two are scored).
Retest	1 = first scoring day · 2 = second scoring day (different day, same 14-day window).
Detector	ITH = iThenticate · ORI = Originality.AI · GPT = GPTZero · COP = Copyleaks · WIN = Winston AI.
AI score	Continuous detector AI-probability, 0–100 (%).
Blank cells	Leave blank until data collected; formula cells self-populate when inputs are entered.

## Sheet: 01_Corpus_Log
PaperID	Arm	Region	Epoch	Primary MeSH topic	Pub year	Journal	IF tertile (1/2/3)	Citations	First-author institution	Corr-author institution	English-editing service? (Y/N)	DOI	Intro words	Disc words	Included? (Y/N)
P001	A	USA	1995–2007	Diabetes Mellitus	2003	Diabetes Care	1	1240	Joslin Diabetes Center, USA	Joslin Diabetes Center, USA	N	10.____/____			Y
P051	B	East Asia	2008–2020	Obesity	2015	Diabetologia	2	640	Peking Union Medical College, CN	Peking Union Medical College, CN	Y	10.____/____			Y

## Sheet: 02_Geographic_Classification
PaperID	Rater 1 class	Rater 2 class	Agreement?	Third-rater class (if needed)	Final class
Cohen's κ (compute in R/Python from columns B–C):					enter value

## Sheet: 03_ArmC_Generation_Log
TextID (P###-AI)	Source PaperID	Section (INT/DIS)	Target words	Generated words	±15%?	Attempts (≤3)	Response ID	QA passed? (Y/N)

## Sheet: 04_Detector_Scoring
Obs ID	TextID	Arm (A/B/C)	Section (INT/DIS)	Detector	Retest (1/2)	Scoring date	Detector version	AI score (0–100)	Flagged words	Total words	Binary @50%
OBS0001

## Sheet: 05_Binary_Thresholds
TextID	Detector	AI score (0–100)	Binary @25%	Binary @50%	Binary @75%

## Sheet: 06_Reliability_ICC
Detector	ICC(2,k) test–retest	95% CI lower	95% CI upper	Pass (≥0.85)?	Action if ICC<0.70
iThenticate					3rd scoring day or pre-registered exclusion
Originality.AI					3rd scoring day or pre-registered exclusion
GPTZero					3rd scoring day or pre-registered exclusion
Copyleaks					3rd scoring day or pre-registered exclusion
Winston AI					3rd scoring day or pre-registered exclusion

## Sheet: 07_Interdetector_Agreement
TextID	ITH @50	ORI @50	GPT @50	COP @50	WIN @50	# positive
Fleiss' κ across the 5 detectors (compute externally) — record per threshold:
κ @25% =
κ @50% =
κ @75% =

## Sheet: 08_Concordance_SubStudy
TextID (10 A + 10 B)	Derived whole-doc AI% (sheet 09)	Native single-document AI%	Difference	Mean
Lin's CCC =
ICC(2,1) =
Bland–Altman bias (mean diff) =

## Sheet: 09_Derived_WholeDoc_AI
TextID	Detector	Flagged words (Intro)	Total words (Intro)	Flagged words (Disc)	Total words (Disc)	Derived whole-doc AI%

[truncated: 1 more sheets: 10_Phase2_Titles]
