# Supplementary material
Source: Research Square preprint supplement (doi:10.21203/rs.3.rs-10164745/v1)
Supplement: Supplementary file 3 [file 6861c2bdfa9ab6233cc1f8ce.docx]

**OSF Pre-Registration Form**

*AUDIT-AI Study (v1.4)*

Algorithmic Penalty for Non-Native Voices in Medical Publishing:

A Three-Arm Diagnostic Accuracy Audit of Five Commercial AI Text Detectors Against Pre-LLM Cardiometabolic Literature

Principal Investigator: Dr Adnan Agha, MBBS, FRCP

College of Medicine and Health Sciences, United Arab Emirates University

Date of pre-registration: 11 May 2026

This document is the OSF pre-registration form for the AUDIT-AI study. It conforms to the Open Science Framework standard pre-registration template and locks all study hypotheses, design parameters, and statistical analysis decisions before data collection begins. Any deviation from the locked plan is recorded as a registered amendment with its date, rationale, and OSF amendment ID.

**Version note (v1.4 — pre-deposit revision of v1.3).** Three changes align this pre-registration with protocol v7 before any data are collected: (a) the primary contrast Arm B − Arm A is now specified as a single, one-sided (directional) test at α = 0.05 with no multiplicity adjustment (Section 9); (b) the power analysis is re-derived at the paper level with corrected, source-verified native-author false-positive anchors (Section 7); (c) Dr Eram Anwar is added as a named author (Section 2). If v1.3 was already deposited, these are entered as registered amendments before scoring begins.

# 1. Title

Algorithmic Penalty for Non-Native Voices in Medical Publishing: A Three-Arm Diagnostic Accuracy Audit of Five Commercial AI Text Detectors Against Pre-LLM Cardiometabolic Literature (the AUDIT-AI Study).

# 2. Authors

Dr Adnan Agha (Principal Investigator), MBBS, FRCP, Department of Internal Medicine, College of Medicine and Health Sciences, United Arab Emirates University. Email: [adnanagha@uaeu.ac.ae](mailto:adnanagha@uaeu.ac.ae). ORCID: 0000-0002-2704-8931.

Dr Eram Anwar (Co-investigator), MBBS, FCPS, Department of Internal Medicine, College of Medicine and Health Sciences, United Arab Emirates University. ORCID: 0009-0006-9335-9208.

Additional statistical consultants, if any, will be added by registered amendment as the study team is finalised.

# 3. Description / Research questions

Commercial AI text detectors are increasingly used by journals, universities, and grant reviewers to screen for AI-generated writing. The cornerstone study (Liang et al., Patterns 2023) reported a 61.3% average false-positive rate across seven detectors on TOEFL essays, with a mechanism rooted in perplexity-based scoring penalising lower lexical variability. Whether this bias generalises to long-form, peer-reviewed medical research literature remains unquantified. AUDIT-AI tests whether five widely-deployed commercial AI detectors assign systematically higher AI-probability scores to pre-2021 cardiometabolic papers from non-native English-speaking author institutions than to native English-speaking author institutions.

Primary research question: Do the false-positive rates of commercial AI text detectors on long-form pre-LLM medical literature differ by author-institution geographic origin?

Secondary research questions: (i) What is each detector's true-positive rate against pristine RAG-grounded Claude Sonnet 4.6 rewrites? (ii) What is the inter-detector agreement on binary AI/human classifications? (iii) Does IMRaD section type moderate the L1 disparity? (iv) Does the disparity persist after controlling for journal impact factor, publication year, and word count?

# 4. Hypotheses (locked)

**H1 (primary, directional): **Mean AI-probability scores will be significantly higher for Arm B (non-native institutions) than for Arm A (native institutions), with an absolute difference of ≥15 percentage points across the detector ensemble.

**H2: **No detector achieves sensitivity ≥0.85 with specificity ≥0.85 simultaneously across both human arms.

**H3: **Inter-detector agreement at the ≥50% binary threshold is poor (Fleiss' κ < 0.40).

**H4: **The native-vs-non-native disparity is largest for Discussion sections and smallest for Methods sections.

**H5: **Author-institution geographic origin remains a significant predictor of AI-probability score after controlling for journal impact factor, publication year, word count, and Flesch-Kincaid grade.

All five hypotheses are locked at the time of OSF deposit. Any subsequent change is documented as a registered amendment.

# 5. Study type

Three-arm cross-sectional diagnostic accuracy and discrimination study. Reporting follows the STARD-AI 2025 guideline for AI-centred diagnostic-accuracy studies (Sounderajah V, Guni A, Liu X, et al. Nat Med 2025;31(10):3283–3289; doi:10.1038/s41591-025-03953-8); the completed 40-item checklist is appended as Supplementary File 5.

# 6. Sample size and corpus

**Locked sample sizes (v1.4): **Arm A (native-institution human) = 50 papers; Arm B (non-native-institution human) = 50 papers; Arm C (Claude Sonnet 4.6 rewrites) = 100 texts. Total corpus = 200 texts. Each text yields TWO narrative sections analysed by detectors (Introduction + Discussion only — hybrid design); Methods and Results are extracted as metadata but not submitted to detectors. 400 sections × 5 detectors × 2 retests → 4,000 detection observations. The Abstract is excluded from detector scoring (rationale: detector reliability floor of 150–300 words; structured-abstract stylistic confound; abstract is Sonnet grounding input).

Eligibility criteria for Arms A and B: cardiometabolic peer-reviewed papers (Diabetes Mellitus, Obesity, Non-alcoholic Fatty Liver Disease, Cardiovascular Diseases MeSH terms), published 1995–2020 inclusive (Citation Classics methodology; epoch-stratified at 25 papers per arm per epoch, with epochs 1995–2007 and 2008–2020), English language. First AND corresponding author institutional affiliations: Arm A = US, UK, Canada, Australia, New Zealand, or Ireland; Arm B = MENA, East Asia, South Asia, Latin America, or non-English-speaking Europe. Top-cited Citation Classics from Scopus or Web of Science within each epoch, with stratified replacement if exclusion criteria apply; geographic classification by two independent raters with disagreements adjudicated by a third reviewer (Cohen's κ reported).

Exclusion criteria: papers with mixed first/corresponding author affiliations spanning native and non-native categories; multinational consortium papers without identifiable lead institution; papers with declared professional English-editing service in the acknowledgements (recorded as a sensitivity-analysis stratifier rather than excluded).

# 7. Power analysis (locked)

**Unit of analysis.** The unit for the primary comparison is the paper (n = 50 per human arm), not the individual detector observation. The five detectors × two sections × two retests are repeated measures on the same paper and are modelled as such, through random intercepts for paper and for detector; they do not multiply the effective sample size. Earlier drafts citing ~1,000 observations per arm reflected pseudoreplication and are superseded.

**Anchor estimates (source-verified, PubMed-indexed).** Native-author false-positive rate on long-form human medical text ≈ 9% (SD ≈ 6%), pooled from Habibzadeh (~10%), Pan (5.8% / 10.9% / 18.6% across settings), Bohler (~8.6%), and Howard (~0%). The non-native rate is anchored conservatively to the documented first-language disparity; the cornerstone effects (Liang 61.3%; Tulchinskii 52–58%; Lege 69.9% on ESL writing) imply a large standardised between-arm effect (Cohen's d ≈ 0.8–1.0) on the paper-mean scale.

**The primary test is one-sided.** Because H1 is directional (Arm B > Arm A), the pre-registered primary contrast is evaluated one-sided at α = 0.05.

- Large effect (d ≈ 0.8–1.0): power > 99% at n = 50/arm.
- Clinically meaningful effect (d = 0.50): ≈ 80% power one-sided at n = 50/arm (≈ 70% two-sided).
- Sample size for 80% power at d = 0.50: n ≈ 51/arm one-sided, versus n ≈ 64/arm two-sided.
- The locked n = 50/arm therefore retains ≥ 80% power for the directional primary test at a clinically meaningful effect, and is powered far beyond that for the expected (large) first-language effect.

**Contingency (retained).** If the built-in pilot returns a pooled SD > 25 on the 0–100 score scale, the sample is inflated to n = 60/arm (restoring ≈ 80% two-sided power at d = 0.50) as a registered amendment; if the pilot Arm B − Arm A difference exceeds 20 points, n = 50/arm is retained. The four API-based detectors are paid from petty cash and are not constrained by the institutional iThenticate upload allocation, so the ensemble is unaffected by that budget.

# 8. Variables

## Independent variable (primary)

- Arm — three-level factor: A (Native-institution human), B (Non-native-institution human), C (Sonnet 4.6 AI rewrite).

## Outcome variables

- Primary: continuous AI-probability score (0–100%) per text × detector × IMRaD section × retest.
- Secondary: binary classification at ≥50% threshold; ROC/AUC for true-positive (Arm C) detection; Fleiss' κ inter-detector agreement; section-type moderator (Arm × Section_IMRaD interaction); derived word-weighted document-level AI percentage.

## Covariates / adjustment variables

- Section — two-level factor (Introduction, Discussion).
- Epoch — 1995–2007 vs 2008–2020 stratum (Citation Classics epoch).
- IF_tertile — journal impact factor tertile within corpus.
- WordCount_z — z-standardised section word count.
- Flesch-Kincaid grade level.
- English_editing_declared — Y/N/Unknown from acknowledgements.

# 9. Analysis plan (locked)

## Primary model

Linear mixed-effects regression: AI_score ~ Arm + Section + Epoch + IF_tertile + WordCount_z + (1 | paper_id) + (1 | detector). The primary contrast is Arm B − Arm A, evaluated as a SINGLE pre-planned, one-sided (directional) test at α = 0.05 with NO multiplicity adjustment, as it is the sole primary comparison. The remaining pairwise contrasts (Arm C vs A, Arm C vs B) and all other group comparisons constitute a secondary family and are Tukey-adjusted. REML estimation with Kenward-Roger degrees of freedom; Satterthwaite as a sensitivity check.

## Secondary models

- Model 2 (section moderator, Aim 4): AI_score ~ Arm × Section + Epoch + covariates + (1|paper_id) + (1|detector).
- Model 3 (adjusted geographic effect, Aim 5): within Arms A and B only, retest geographic-origin term controlling for IF, year, word count, Flesch-Kincaid, English-editing-service flag.
- Document-level outcome: same as primary with section_id removed and one record per paper-detector-retest.

## Other secondary analyses

- Binary FPR comparison: two-proportion z-test with Wilson 95% CI, stratified by detector.
- ROC/AUC: pROC; DeLong's test for AUC differences between detectors.
- Inter-detector agreement: Fleiss' κ at ≥50% threshold; ICC(2,k) at the continuous level.
- Concordance sub-study (n=20): Bland-Altman, Lin's CCC, ICC(2,1) for derived vs native whole-document scoring.
- Sentence-level exploratory analysis (3 detectors only — Originality, GPTZero, Copyleaks): proportion of words in ≥85% AI-probability sentences per IMRaD section. Descriptive only, not used in primary inference.

## Subgroup and sensitivity analyses (pre-specified)

- Geographic region within Arm B: MENA, East Asia, South Asia, Latin America, non-English Europe.
- IMRaD section type.
- Publication decade (2010–14 vs 2015–20).
- Impact factor tertile.
- Declared English-editing service vs not.
- Threshold variation for binary outcomes: 25%, 50%, 75%.
- Bootstrap (10,000 iterations) for non-parametric CI on FPR.

# 10. Arm C generation pipeline (locked)

Arm C is generated through a decoupled three-stage pipeline implemented as Python scripts (extract_packet.py, generate_arm_c.py, qa_gate.py) and a JSON Schema v1.2. The pipeline source code is deposited on OSF alongside this pre-registration.

Stage 1 (Extraction): each source paper PDF is parsed by LlamaParse (vision-language-model OCR) for accurate extraction of complex medical-trial tables. The extracted Markdown is assembled into a JSON v1.2 packet containing: the abstract with Conclusion sentence stripped; main paper tables verbatim (≤4,000 tokens); figure captions sterilised via Claude Haiku 4.5; supplementary appendix tables whitelist-filtered (baseline characteristics, primary/secondary outcomes, safety; ≤8,000 tokens); and 30 random-sampled references. Total prompt budget ≤21,500 tokens. The use of LlamaParse for extraction and Claude Sonnet 4.6 for generation establishes a methodological air-gap that pre-empts the training-data contamination critique.

Stage 2 (Generation): Claude Sonnet 4.6 (Anthropic API, model claude-sonnet-4-6, temperature 0.7, top_p 0.9, max_tokens 3,000 per section) generates two narrative sections per paper — Introduction and Discussion only. Methods and Results are not generated because those sections are stylistically dominated by low-perplexity technical boilerplate that elevates baseline detector FPR equally for native and non-native human writing, compressing the L1 signal toward null. Target word counts are jittered ±5% per paper around design-typical means. The system prompt enforces the stylometric override (high burstiness, banned LLM stock transitions, structural asymmetry) and the grounding constraint (no invented statistics or claims).

Stage 3 (QA gate): qa_gate.py compares each generated section against its target ±15% tolerance band using a deterministic prose-only word counter (which strips inline citations, statistical reporting blocks, and figure/table references before counting, avoiding the 15–20% inflation that naïve counts produce); up to three regenerations are triggered if out-of-range; all attempts are logged with response IDs.

A sensitivity arm of 30 GPT-5.5 rewrites (Introduction and Discussion only, 10 from Arm A, 10 from Arm B, 10 mixed) is generated under identical RAG and stylometric constraints and scored across all five detectors; this is exploratory and does not modify the primary analysis.

# 11. Detector ensemble (locked)

Five commercial AI text detectors form the locked ensemble: Turnitin / iThenticate (UAEU institutional access), Originality.AI (paid API), GPTZero (paid API), Copyleaks (paid API), Winston AI (paid API). Each of the 400 sections (200 texts × 2) is submitted twice on different days within a 14-day scoring window for test-retest reliability (ICC reported per detector). Detector versions and dates of access are frozen at the start of the scoring window and reported in the final manuscript.

# 12. Pilot calibration (built-in)

A 5-paper-per-arm pilot (15 texts × 5 detectors × 2 sections × 2 retests = 300 observations) is conducted before full data collection. Pre-registered contingency: if observed pooled SD exceeds 25, sample size is inflated to n=60/group; if Arm B − Arm A delta exceeds 20 percentage points in pilot data, n=50/group is retained as planned. Pilot decision is recorded as a registered amendment regardless of outcome.

# 13. Stopping rules and quality controls

- Inter-rater reliability for geographic classification: target Cohen's κ ≥ 0.80; if pilot returns κ < 0.70, a third independent rater is added before scaling.
- Test-retest reliability for detector scores: target ICC ≥ 0.85 per detector. ICC < 0.70 for any detector triggers either a third scoring day or pre-registered exclusion of that detector from primary analysis.
- QA gate convergence: any IMRaD section that fails to converge to the ±15% target after 3 regenerations is accepted with the closest output and flagged in the metadata. >5% non-convergence rate triggers a registered amendment to revisit the prompt or tolerance.
- Vendor account integrity: if any detector vendor terminates the paid account during scoring, partial data are reported transparently in the methods section (cf. GPTZero-Copyleaks precedent). No mid-study vendor substitution without a registered amendment.

# 14. Ethics

The study uses only published peer-reviewed papers and commercial detector outputs. There are no human participants, no animal subjects, no patient records, no biospecimens, and no identifiable private information. The study has been determined to constitute Non-Human Subjects Research (NHSR) by the College of Medicine and Health Sciences Research Office, UAEU, on [date — to be inserted]. The HREC Chair has confirmed the project falls outside HREC jurisdiction. The NHSR determination memo is appended to this pre-registration.

# 15. Data and code sharing

- Schema: schema_v1.2.json (locked at pre-registration).
- Pipeline code: extract_packet.py, generate_arm_c.py, qa_gate.py (frozen versions).
- Extraction packets: all 100 data_packets/P*.json with human_qa_passed=true.
- Generated outputs: all 200 narrative section markdown files (Introduction and Discussion only) plus per-section .meta.json audit logs.
- Detector outputs: de-identified scores (paper-level identifiers retained as P001–P100; author names suppressed).
- Sterilisation logs and QA-gate decision logs.
- Reproducible R analysis pipeline (Quarto + Git).

All artefacts are deposited under CC-BY 4.0 at the time of publication. Hashes of source PDFs are deposited at pre-registration; the PDFs themselves are not redistributed (copyright).

# 16. Conflicts of interest

The Principal Investigator declares no financial relationships with any of the detector vendors, with Anthropic, or with OpenAI. The detectors are accessed through standard institutional and paid API channels. The study has no industry sponsorship. Any future relationships will be disclosed via registered amendment.

# 17. Phase 2 Title Spin-off Pre-Registration

This pre-registration locks the framework for a Phase 2 follow-up study examining AI-generated alternate paper titles. The framework is registered here so that AUDIT-AI's Arm C generation pipeline can produce the additional title outputs in the same Stage 2 run, at zero marginal scientific cost; the Phase 2 study launches independently after AUDIT-AI publication.

**T1 (Likert attractiveness): **AI-generated titles will score significantly higher on Attractiveness than human titles (mean difference ≥0.5 Likert points).

**T2 (Likert clarity): **AI-generated titles will score equivalently or higher on Clarity (non-inferiority margin: 0.3 Likert points).

**T3 (Likert credibility): **AI-generated titles will score lower on Scientific Credibility (mean difference ≥0.3 Likert points).

**T4 (Flesch metrics): **AI-generated titles will exhibit higher Flesch Reading Ease and lower Flesch-Kincaid Grade Level than human titles.

- Design: 100 human titles (verbatim from AUDIT-AI source papers) vs 100 AI titles (generated by Claude Sonnet 4.6 with a dedicated click-optimisation prompt during AUDIT-AI Stage 2). 3 non-endocrinologist clinician raters, blinded to title origin, rate all 200 titles in randomised order using 5–10 second rapid Likert assessment.
- Subjective outcomes: 5-point Likert scale on Attractiveness, Clarity, Scientific Credibility.
- Objective outcomes: Flesch Reading Ease (FRE) and Flesch-Kincaid Grade Level (FKGL), computed via the textstat Python library.
- Analysis: mixed-effects models with title-pair as random intercept; ICC(2,k) for inter-rater reliability; paired-sample t-tests for Flesch metrics; Spearman correlation between Likert ratings and Flesch scores.
- Ethics: low-risk human subjects research; separate HREC application submitted within 1 month of AUDIT-AI manuscript acceptance.
- Marginal cost over AUDIT-AI: ~$5 in Anthropic API credits for 100 title-generation calls; rater honorarium budget ~AED 1,500–3,000 separate from AUDIT-AI petty cash.
- Target venues: BMJ Open · JMIR Medical Informatics · JAMIA · PLOS ONE.

# 18. AI use disclosure

Per ICMJE and WAME guidelines, AI tools have been used at the following points in protocol development and will be similarly disclosed in the final manuscript: (i) Claude Sonnet 4.6 was used in protocol drafting and refinement (PI retained final editorial control on all content); (ii) Claude Sonnet 4.6 is the locked Arm C generator (deterministic, version-pinned); (iii) Claude Haiku 4.5 is the locked extraction-stage caption sterilisation tool. No AI tool participated in any component of statistical analysis or hypothesis testing. No AI tool met ICMJE authorship criteria and none is listed as an author.

# 19. Timeline

Months 1–2: ethics determination, OSF pre-registration deposit, vendor API procurement, RA training. Months 3–4: corpus construction with inter-rater reliability check. Month 5: pilot phase (5 papers per arm). Months 6–8: full Arm A and Arm B detector scoring. Month 9: Arm C generation and scoring; concordance sub-study. Month 10: detector test-retest stability check. Month 11: statistical analysis. Month 12: manuscript drafting and submission to Patterns / BMJ / Lancet Digital Health / JAMA.

# 20. Amendments

All deviations from this pre-registration are logged on OSF as registered amendments with: (a) date of decision, (b) section affected, (c) original specification, (d) revised specification, (e) rationale, (f) signature of the PI. Amendments are visible on the public OSF project page. The final manuscript reports the original pre-registered plan and all amendments transparently.

# 21. Pre-registration acceptance and signature

By depositing this pre-registration on OSF, the Principal Investigator commits to: (i) executing the locked design as specified; (ii) reporting all pre-registered analyses regardless of outcome; (iii) clearly distinguishing pre-registered from exploratory analyses in the final manuscript; (iv) registering all amendments before the analysis they affect; (v) depositing all data, code, and audit logs as committed in Section 15.

Signed: ______________________________

Dr Adnan Agha, MBBS, FRCP

Principal Investigator

Date: ______________________________
