# Supplementary material
Source: Research Square preprint supplement (doi:10.21203/rs.3.rs-10164745/v1)
Supplement: Supplementary file 4 [file f8bee504bfd89ab814a02b09.xlsx]

## Sheet: 00_Instructions
AUDIT-AI — iThenticate Operator Workbook
Version 1.3 · operational sub-workbook for the 14-day iThenticate scoring window (operator: Prof Shehab Majud)
Setting / step	Action
Module	Use the Turnitin/iThenticate AI Writing Detection module (not similarity %).
Repository submission	MUST be set to 'Do not add to repository' / no index — prevents corpus contamination of the UAEU database.
Version & date	Record the iThenticate AI-model version and access date for EVERY upload (column in 01_Upload_Log).
What to upload	Each section file separately: Introduction and Discussion of every text (human P001–P100 and AI P001-AI–P100-AI).
Budget	Approved ≈ 450 uploads. 400 first-pass sections + ~50 retest subsample. Track on 03_Daily_Tracker.
First pass	Upload all 400 sections (200 texts × 2 sections); record AI% and flagged words in 01_Upload_Log.
Retest	Re-upload the pre-specified retest subsample on a DIFFERENT day; record in 02_Retest_Log (for ICC).
Out-of-scope	Do NOT score Abstract, Methods, or Results. Do NOT change detector settings mid-window.
Hand-off	Copy AI% / flagged-words into Master Workbook sheet 04 (Detector = ITH).

## Sheet: 01_Upload_Log
TextID	Section (INT/DIS)	Arm (A/B/C)	Upload date	iThenticate version	AI score (0–100)	Flagged words	Total words	Notes

## Sheet: 02_Retest_Log
TextID	Section (INT/DIS)	Retest date	AI score (0–100)	Notes

## Sheet: 03_Daily_Tracker
Date	Uploads today	Cumulative	Budget	Remaining
			450

## Sheet: 04_Settings_Checklist
Confirm before each session	Checked? (Y)
AI Writing Detection module selected
Repository submission disabled (no index)
Detector version + date recorded
Correct section file (INT or DIS) being uploaded
Not uploading Abstract / Methods / Results
